# Supplementary material for: How are vegetable gardens used, managed and resourced in Australian primary schools? A mixed-methods study
Source: Research Square preprint supplement (doi:10.21203/rs.3.rs-7467453/v1), 2025-09-29
Supplement: Supplementary file 1 [file 0a871de709a650d3db903a05.docx]

Additional file 1: School gardens survey

**School Gardens in Australian Primary Schools**

Start of Block: Default Question Block

This questionnaire is about your experiences of school gardens in your primary school (in Australia). Please answer all the questions to the best of your knowledge. This questionnaire should take between 5 to 10 minutes to complete. Please read our [Plain](https://researchsurveys.deakin.edu.au/CP/File.php?F=F_5iFfguGIWJ68cQd) [Language Statement](https://researchsurveys.deakin.edu.au/CP/File.php?F=F_5iFfguGIWJ68cQd) for further details about this survey. Please be assured that all information you provide will be kept anonymous.

Are you over 18 years old and do you agree with the conditions outlined by the Plain Language Statement?

- Yes
- No

Q1 Are you currently working in an Australian Primary School?

- Yes, I am working as a teacher
- Yes, I am working but not as a teacher
- No

Q2 What is the postcode of the school in which you currently teach?

- Please enter a valid AU post code

Q3 What type of school do you currently teach in?

- Government
- Catholic
- Independent (private)
- Other, please specify:

Q4 Approximately how many students attend the school in which you teach?

Q5 Approximately, how long (in years and months) have you taught at your present school?

Q6 Does your school have a vegetable and/or herb garden? From here on in, this vegetable and/or herb garden is referred to as “garden”.

- Yes
- No

End of Block: Default Question Block

Start of Block: Part A (If you answered Yes to Q6)

Q7 Is the garden part of the Stephanie Alexander Kitchen Garden (SAKGF) Foundation?

- Yes
- No

Q8 Why does your school have a garden? (Please describe the reasons in your own words.)

Q9 Which foods and/or herbs are grown in the garden? (Please list the main foods that are grown.)

Q10 How is the garden used through the year?

Q11 Who looks after the garden? Tick all that apply.

▢The teacher(s)

▢A garden specialist

▢Care is shared amongst staff

▢Parents

▢Students

▢Other, please specify:

Q12 How are students involved in the garden? Tick all that apply.

▢Planting and growing

▢Harvesting

▢Cooking the produce

▢Eating the produce

▢Other, please specify:

Q13 If the students use the produce to prepare food, how often do they do this?

Q14 Is the product consumed by the students?

- Yes, it is consumed by the students. Please describe (e.g. when, where, how often)?
- No, it is not consumed by the students. Please describe what happens to the produce:

Q15 Which grades participate in the garden? Tick all that apply.

▢Reception/Foundation/Prep

▢Grade 1

▢Grade 2

▢Grade 3

▢Grade 4

▢Grade 5

▢Grade 6

▢Grade 7

Q16 Are garden activities incorporated in the food and nutrition curriculum?

- Yes, a lot
- Yes, a little
- No

Q16a How is the garden used in the food and nutrition curriculum? Tick all that apply.

▢To explain about healthy eating

▢To teach food skills

▢To explain some principles of nutrition

▢To explain environmental sustainability

▢To build social skills

▢To build teamwork

▢Others, please specify:

Q17 Are food and nutrition topics taught in your school’s curriculum? Please explain.

- Yes
- No

Q18 Do students participate in cooking classes?

- Yes regularly
- Yes, occasionally
- No

Q19 If they do, which grades take part in cooking classes?

▢Reception/Foundation/Prep

▢Grade 1

▢Grade 2

▢Grade 3

▢Grade 4

▢Grade 5

▢Grade 6

▢Grade 7

Q19 If they do not, why not? Tick all that apply.

▢No facilities

▢No time

▢No space in curriculum

▢Lack of cooking expertise

▢Others, please specify:

End of Block: Part A (If you answered Yes to Q6)

Start of Block: Part B (If you answered No to Q6)

Q7 Why doesn’t your school have a garden? Tick all that apply.

▢Lack of time,

▢Lack of support or interest

▢Lack of funding

▢Lack of gardening expertise

▢Others, please specify:

Q8 Does your school want a school garden?

- If yes, why does your school want a school garden?
- If no, why doesn’t your school want a school garden?

Q8a If you answered yes to the previous question, who would be expected to look after the garden?

▢The teacher(s)

▢A garden specialist

▢Care will be shared amongst staff

▢The parents

▢Others, please specify:

Q8b What would the school use the garden for?

▢Planting and growing

▢Harvesting

▢Cooking the produce

▢Eating the produce

▢Others, please specify:

Q9 Does your school's curriculum teach food and nutrition topics? Why?

- Yes
- No

Q10 Do students participate in cooking classes?

- Yes regularly
- Yes, occasionally
- No

Q11 If they do, which grades take part in cooking classes?

▢Reception/Foundation/Prep

▢Grade 1

▢Grade 2

▢Grade 3

▢Grade 4

▢Grade 5

▢Grade 6

▢Grade 7

Q12 If they do not, why not? Tick all that apply.

▢No facilities

▢No time

▢No space in curriculum

▢Lack of cooking expertise

▢Others, please specify:

End of Block: Part B (If you answered No to Q6)
