# Supplementary material for: How are vegetable gardens used, managed and resourced in Australian primary schools? A mixed-methods study
Source: Research Square preprint supplement (doi:10.21203/rs.3.rs-7467453/v1), 2025-09-29
Supplement: Supplementary file 2 [file 43e3077cee1fab5c09efe55e.docx]

Additional file 2: Interview schedule

# Who looks after/works with the school garden?

- - Teachers
    - All teachers?
    - Is there a specialist ‘garden teacher’ who just runs the garden and cooking classes?
      - Is that person a qualified teacher? Or teachers’ aid?
    - Can you, as a teacher, choose to work in the school garden, or is it an obligation?
  - Children
    - What age?
    - Which year levels?
    - All children in class, or a smaller group?
  - School maintenance personnel?
  - Are parents/carers/grandparents involved? Why/why not?
  - How sustainable is the school garden? Does it cost the school money to maintain?
    - What resources and support systems do you rely on?
    - Is there a fee that parents have to pay to access the garden program?
      - What happens if parents don’t pay?
  - What happens in school holidays? Does someone continue to maintain the garden?

# How is the school garden used?

- - Do children work in the garden during classes?
    - How often?
    - What do they do?
  - Do children work in the garden during breaks? Are they supervised?
  - Do the children cook and consume the produce?
    - What facilities do you have available for this?
    - What are some examples of the things that students cook?
    - Where do they consume these?

# How is the garden incorporated into the curriculum?

- - What areas of the curriculum is it part of?
  - What skills/knowledge are learned?
  - Is it a purposeful/structured learning task, or a simply a consequence of working with the garden?

# How much support for the school garden is there within the school community?

- - Among other teachers and principal
  - Among parents/carers
  - Students

# Thinking about your experience, what do you think are the benefits of having a school garden?

1. **Are there any barriers or issues with having a school garden?**
   - Cost, time, personnel?
   - Are there barriers to expanding/including the school garden in the curriculum?
   - How do you think your school garden could be improved?
